# Supplementary material for: Ultrathin PANI-Decorated, Highly Purified and Well Dispersed Array Cncs for Highly Sensitive HCHO Sensors
Source: MDPI journal article supplement (doi:10.3390/chemosensors9100276), 2021-09-28
Supplement: s1 [file s1]

# Ultrathin PANI-Decorated, Highly Purified and Well Dispersed Array Cncs for Highly Sensitive HCHO Sensors

Qingmin Hu <sup>1,†</sup>, Zhiheng Ma <sup>1,†</sup>, Jie Yang <sup>2</sup>, Tiange Gao <sup>1</sup>, Yue Wu <sup>1</sup>, Zhe Dong <sup>1</sup>, Xuyi Li <sup>1</sup>, Wen Zeng <sup>3</sup>, Shichao Zhao <sup>2</sup> and Jiaqiang Xu <sup>1,\*</sup>

<sup>1</sup> NEST Lab, Department of Physics, Department of Chemistry, College of Science, Shanghai University, Shanghai 200444, China; huqingmin@shu.edu.cn (Q.H.); Marquerzh@shu.edu.cn (Z.M.); gaotiang@shu.edu.cn (T.G.); mrtun@shu.edu.cn (Y.W.); ss996584188@shu.edu.cn (Z.D.); xuyili@shu.edu.cn (X.L.)

<sup>2</sup> State Key Laboratory of Coal Conversion, Institute of Coal Chemistry, Chinese Academy of Sciences, Taiyuan 030001, PR China; yangjie16@mails.UCAS.ac.cn (J.Y.); zhaoshichao@sxicc.ac.cn (S.Z.)

<sup>3</sup> School of Materials Science and Engineering, Chongqing University, Chongqing 400044, China; wenzeng@cqu.edu.cn

\* Correspondence: xujiaqiang@shu.edu.cn

† These authors contribute equally to this work.

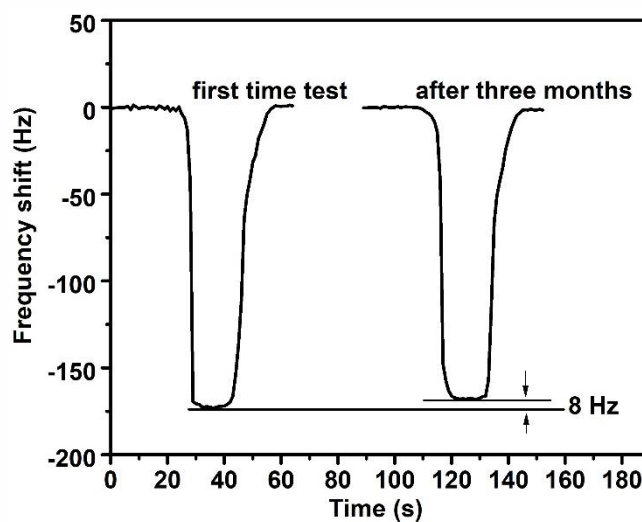

Figure S1. The long-term stability of the 3-PANI-CNC sensor.
